# Supplementary material for: Recent progress in microneme-based vaccines development against Toxoplasma gondii
Source: PubMed Central journal article supplement — Clin Exp Vaccine Res. 2018 Jul 31;7(2):93–103. doi: 10.7774/cevr.2018.7.2.93 (PMC6082678; doi:10.7774/cevr.2018.7.2.93), 2018-07-31
Supplement: cevr-7-93-s002.pdf [file cevr-7-93-s002.pdf]

**Supplementary Table 2.** Baseline characteristics of included studies based on immunization experiments with *Toxoplasma gondii* DNA-encoding MICs in mouse models (mixed antigens)

| Antigen                                     | Adjuvant or carrier | Ag delivery  | Mouse strain | Challenge                                                                              | Immune responses                                                                                                                                                                                                                                                                                                                                                                                                                                                                                                                                                                                         | Brain cyst load                                                                | Survival                                                                                                                                                | Conclusions or suggestions                                                                                                                                                                                                                                                                | Reference |
|---------------------------------------------|---------------------|--------------|--------------|----------------------------------------------------------------------------------------|----------------------------------------------------------------------------------------------------------------------------------------------------------------------------------------------------------------------------------------------------------------------------------------------------------------------------------------------------------------------------------------------------------------------------------------------------------------------------------------------------------------------------------------------------------------------------------------------------------|--------------------------------------------------------------------------------|---------------------------------------------------------------------------------------------------------------------------------------------------------|-------------------------------------------------------------------------------------------------------------------------------------------------------------------------------------------------------------------------------------------------------------------------------------------|-----------|
| MIC2 (MIC2a and MIC2b) +MIC3+MIC4+M2AP+AMA1 | -                   | Plasmid, i.m | BALB/c       | 30 Cysts of avirulent <i>T. gondii</i> strain SSI119, orally                           | <i>T. gondii</i> -specific IgG against MIC2a, MIC4, M2AP, and AMA1 protein products, whereas no IgG response was detected against MIC2b and MIC3.                                                                                                                                                                                                                                                                                                                                                                                                                                                        | Reduced (84%, $p < 0.0021$ )                                                   | NR                                                                                                                                                      | The results showed that a combination of these antigenic regions should be considered in the design of potential vaccines against toxoplasmosis.                                                                                                                                          | [20]      |
| MIC3+SAG1                                   | -                   | i.m          | BALB/c       | $1 \times 10^3$ Tachyzoites, RH strain, i.p                                            | Induced a strong IgG antibody response ( $p < 0.01$ )<br>↑ Splenocyte proliferation ( $p < 0.05$ )<br>↑ IFN- $\gamma$ ( $p < 0.05$ )<br>Similar levels of IL-4 and IL-10 between the different immunized and unimmunized groups ( $p > 0.05$ )                                                                                                                                                                                                                                                                                                                                                           | NR                                                                             | Prolonged survival time ( $p < 0.05$ )                                                                                                                  | These results indicated that cocktail-vaccine immunization could be employed as an alternative way to develop new-generation vaccines against <i>T. gondii</i> infection.                                                                                                                 | [5]       |
| MIC3+ROP18                                  | -                   | i.m          | ICR          | $1 \times 10^3$ Tachyzoites, RH strain, i.p                                            | Induced a strong IgG antibody response ( $p < 0.05$ )<br>Predominance of IgG2a over IgG1 (IgG2a values in the pMIC3-ROP18 immunized group were significantly higher than the single-gene immunized group, $p < 0.05$ )<br>↑ Splenocyte proliferation ( $p < 0.05$ )<br>↑ IFN- $\gamma$ ( $849 \pm 86$ pg/mL, $p < 0.05$ ) and IL-4 ( $66 \pm 14$ pg/mL, $p < 0.05$ )<br>Higher levels of IFN- $\gamma$ in mice vaccinated with pMIC3-ROP18, compared that other groups ( $p < 0.05$ )<br>No significant difference between multi-antigenic group and single-gene group in IL-4 production ( $p > 0.05$ ) | NR                                                                             | Increased survival time (19 days compared with 7 days in control, $p < 0.05$ )                                                                          | Our study indicates that the introduction of multi-antigenic DNA vaccine is more powerful and efficient than single-gene vaccine. These results suggested that multi-antigenic DNA immunization might be an important approach to achieve an effective vaccine against <i>T. gondii</i> . | [6]       |
| MIC3+GRA1                                   | -                   | i.m          | BALB/c       | $1 \times 10^4$ (high dose) and $1 \times 10^2$ (low dose) tachyzoites, RH strain, i.p | ↑ Specific IgG antibody response ( $p < 0.05$ )<br>The levels of IgG in pMIC3-GRA1 group was higher than the group of pGRA1 or pMIC3 ( $p < 0.05$ ).<br>↑ IFN- $\gamma$ ( $p < 0.05$ )<br>Significantly higher levels of IFN- $\gamma$ production in the mice vaccinated with pMIC3-GRA1 than pGRA1 or pMIC3 ( $p < 0.05$ )                                                                                                                                                                                                                                                                              | ↓ Parasite burden in brain (57.5%, $p < 0.01$ ) and liver (55.1%, $p < 0.01$ ) | High dose: increased survival time (15.7 $\pm$ 1.88 days, $p < 0.05$ )<br>Low dose: increased survival rate (80%, 32 days after challenge, $p < 0.01$ ) | These observations suggest that multi-antigenic DNA vaccine is more eligible for effective anti- <i>T. gondii</i> vaccine investigation. Further studies should be considered on other potent effective antigens, suitable adjuvants and other animal models.                             | [9]       |
| MIC3+GRA5                                   | -                   | i.m          | BALB/c       | $1 \times 10^4$ Tachyzoites, RH strain, i.p                                            | ↑ Levels of IgG1 and IgG2a ( $p < 0.05$ )<br>↑ IFN- $\gamma$ and IL-4 ( $p < 0.05$ )<br>↑ Proliferation SI ( $p < 0.05$ )                                                                                                                                                                                                                                                                                                                                                                                                                                                                                | NR                                                                             | Prolonged survival time (12 days compared with 6 days in control, $p < 0.05$ )                                                                          | These results indicated DNA vaccine encoded MIC3 and GRA5 genes of <i>T. gondii</i> capable to induced partially protection against toxoplasmosis.                                                                                                                                        | [7]       |

(Continued to the next page)

Supplementary Table 2. Continued

| Antigen   | Adjuvant or carrier  | Ag delivery | Mouse strain | Challenge                                       | Immune responses                                                                                                                                                                                                                                                                                                                                                                                                                                                                                                                                                                                                                                                                                                                                                                                                                                                                                                                                                                                                                                                                                                                   | Brain cyst load                                                                                                                  | Survival                                                                                                                                                                                                                    | Conclusions or suggestions                                                                                                                                                                                                                                                                                                                                                                                                                                                                                      | Reference |
|-----------|----------------------|-------------|--------------|-------------------------------------------------|------------------------------------------------------------------------------------------------------------------------------------------------------------------------------------------------------------------------------------------------------------------------------------------------------------------------------------------------------------------------------------------------------------------------------------------------------------------------------------------------------------------------------------------------------------------------------------------------------------------------------------------------------------------------------------------------------------------------------------------------------------------------------------------------------------------------------------------------------------------------------------------------------------------------------------------------------------------------------------------------------------------------------------------------------------------------------------------------------------------------------------|----------------------------------------------------------------------------------------------------------------------------------|-----------------------------------------------------------------------------------------------------------------------------------------------------------------------------------------------------------------------------|-----------------------------------------------------------------------------------------------------------------------------------------------------------------------------------------------------------------------------------------------------------------------------------------------------------------------------------------------------------------------------------------------------------------------------------------------------------------------------------------------------------------|-----------|
| MIC4+SAG1 | pCTA <sub>2</sub> /B | i.n         | BALB/c       | 1 × 10 <sup>7</sup> Tachyzoites, RH strain, i.p | Induced a strong IgG and IgA antibodies responses (p<0.05). The levels of IgA and IgG antibodies were higher in the sera of mice co-immunized with pCTA <sub>2</sub> /B than in the sera of mice immunized with pMIC4-SAG1 alone (p<0.001). The predominance of IgG2a over IgG1 IgG2a values in the pMIC4-SAG1 plus pCTA <sub>2</sub> /B immunized group were significantly higher than the pMIC4-SAG1 immunized group (p<0.01). Similar values of IgG1 between pMIC4-SAG1 and pMIC4-SAG1 +pCTA <sub>2</sub> /B (p>0.05)<br>↑ Splenocyte proliferation (p<0.05)<br>Co-administration of pCTA <sub>2</sub> /B augmented splenocyte proliferation when compared to proliferation by spleen cells from mice immunized with pMIC4-SAG1 alone (p<0.001)<br>↑ IFN-γ (1,136 ± 152 pg/mL, p<0.05 and 1,874 ± 465 pg/mL, p<0.001 for pMIC4-SAG1 and pMIC4-SAG1+pCTA <sub>2</sub> /B groups, respectively)<br>↑ IL-12 (845 ± 37 pg/mL, p<0.05 and 1,228 ± 98 pg/mL, p<0.001 for pMIC4-SAG1 and pMIC4-SAG1+pCTA <sub>2</sub> /B groups, respectively)<br>↓ IL-4 in mice immunized with pMIC4-SAG1+pCTA <sub>2</sub> /B (23 ± 3 pg/mL, p<0.05) | NR                                                                                                                               | pMIC4-SAG1: prolonged survival time (death within 14 days, p<0.05)<br>pMIC4-SAG1+pCTA <sub>2</sub> /B: increased survival rate (14%, 20-day post challenge, p<0.05)<br>All mice in the control groups died within 6-7 days. | These results provided a foundation for further studies toward the use of multiantigenic DNA vaccines combined with mucosal adjuvants to develop an efficient and long-term protective immunity against <i>T. gondii</i> and other intracellular parasite infections.                                                                                                                                                                                                                                           | [10]      |
| MIC6+PLP1 | pIL-18               | i.m         | Kunming      | 20 and 80 cysts of strain PRU, i.g              | Induced a strong IgG antibody response in the sera of mice immunized with pIRESneo-MIC6-TgPLP1 or pIRESneo-MIC6-TgPLP1+pVAX-IL-18 (especially in the latter group, p<0.01)<br>↑ Proliferation SI (6.74 ± 0.14 and 8.63 ± 0.15 in mice immunized with pIRESneo-MIC6-TgPLP1 and pIRESneo-MIC6-TgPLP1+pVAX-IL-18, respectively, p<0.05)<br>↑ IFN-γ, IL-2, IL-12, IL-4, and IL-10 (p<0.05)                                                                                                                                                                                                                                                                                                                                                                                                                                                                                                                                                                                                                                                                                                                                             | Reduced (61.6% and 65.43% in mice immunized with pIRESneo-MIC6-TgPLP1 and pIRESneo-MIC6-TgPLP1+pVAX-IL-18, respectively, p<0.05) | Prolonged survival time<br>pIRESneo-MIC6-TgPLP1: 42.8 ± 2.9 days (p<0.05)<br>pIRESneo-MIC6-TgPLP1+pVAX-IL-18: 45.0 ± 2.9 days (p<0.05)<br>Control mice were died within 25 days.                                            | Immunization with the recombinant plasmid DNA encoding <i>T. gondii</i> TgPLP1 and MIC6 offers protective efficacy, and this is a promising vaccine candidate against chronic toxoplasmosis. The application of targeted stage-specific immunization strategies and/or combination with other effective antigens should improve the protective effect of TgPLP1 or MIC6 and potentially eliminate or significantly mitigate the risks of brain cyst reactivation during chronic infection by <i>T. gondii</i> . | [13]      |

MIC, microneme proteins; i.m, intramuscular; IFN-γ, interferon-γ; IL, interleukin; SI, stimulation index; i.n, intranasal.
