# Supplementary material for: Recent progress in microneme-based vaccines development against Toxoplasma gondii
Source: PubMed Central journal article supplement — Clin Exp Vaccine Res. 2018 Jul 31;7(2):93–103. doi: 10.7774/cevr.2018.7.2.93 (PMC6082678; doi:10.7774/cevr.2018.7.2.93), 2018-07-31
Supplement: cevr-7-93-s003.pdf [file cevr-7-93-s003.pdf]

**Supplementary Table 3.** Baseline characteristics of included studies based on immunization experiments with protein vaccines against *Toxoplasma gondii* in mouse models (single antigens)

| Antigen | Adjuvant or carrier | Ag delivery | Mouse strain                | Challenge                                  | Immune responses                                                                                                                                                                                              | Brain cyst load                   | Survival                                                                                            | Conclusions or suggestions                                                                           | Reference |
|---------|---------------------|-------------|-----------------------------|--------------------------------------------|---------------------------------------------------------------------------------------------------------------------------------------------------------------------------------------------------------------|-----------------------------------|-----------------------------------------------------------------------------------------------------|------------------------------------------------------------------------------------------------------|-----------|
| MIC1    | FCA and FIA         | s.c         | C57BL/6 (H-2 <sup>b</sup> ) | 40 and 80 cysts of the ME49 strain, orally | Induced a strong IgG antibody response (p<0.05) induced mixed Th1/Th2 immune responses with predominance of IgG2b over IgG1 (p<0.05) ↑ Splenocyte proliferation (p<0.05) ↑ IFN-γ and IL-10 (p<0.05)           | Reduced (52%, p<0.05)             | Increased survival rate (50%, 30-day post challenge, p<0.05) Control mice were died within 11 days. | The use of this vaccine offers a promising strategy for conferring protection against toxoplasmosis. | [21]      |
| MIC4    | FCA and FIA         | s.c         | C57BL/6 (H-2 <sup>b</sup> ) | 40 and 80 cysts of the ME49 strain, orally | Induced a strong IgG antibody response (p<0.05) induced mixed Th1/Th2 immune responses with predominance of IgG2b over IgG1 (p<0.05) ↑ Splenocyte proliferation (p<0.05) ↑ IFN-γ and IL-10 (p<0.05)           | Reduced (46.9%, p<0.05)           | Increased survival rate (50%, 30-day post challenge, p<0.05) Control mice were died within 11 days. | The use of this vaccine offers a promising strategy for conferring protection against toxoplasmosis. | [21]      |
| MIC6    | FCA and FIA         | s.c         | C57BL/6 (H-2 <sup>b</sup> ) | 40 and 80 cysts of the ME49 strain, orally | Induced a strong IgG antibody response (p<0.05) induced mixed Th1/Th2 immune responses with predominance of IgG2b over IgG1 (none significant) ↑ Splenocyte proliferation (p<0.05) ↑ IFN-γ and IL-10 (p<0.05) | Reduced (27.2%, none-significant) | Increased survival rate (40%, 30-day post challenge, p<0.05) Control mice were died within 11 days. | The use of this vaccine offers a promising strategy for conferring protection against toxoplasmosis. | [21]      |

MIC, microneme proteins; FCA, Freund's complete adjuvant; IFN-γ, interferon-γ; IL, interleukin; Th1, T helper 1.

**Supplementary Table 4.** Baseline characteristics of included studies based on immunization experiments with protein vaccines against *Toxoplasma gondii* in mouse models (mixed antigens)

| Antigen        | Adjuvant or carrier | Ag delivery | Mouse strain                | Challenge                                  | Immune responses                                                                                                                                                             | Brain cyst load         | Survival                                                                                            | Conclusions or suggestions                                                                                                                                                                | Reference |
|----------------|---------------------|-------------|-----------------------------|--------------------------------------------|------------------------------------------------------------------------------------------------------------------------------------------------------------------------------|-------------------------|-----------------------------------------------------------------------------------------------------|-------------------------------------------------------------------------------------------------------------------------------------------------------------------------------------------|-----------|
| MIC1+MIC4      | FCA and FIA         | s.c         | C57BL/6 (H-2 <sup>b</sup> ) | 40 and 80 cysts of the ME49 strain, orally | Mixed IgG1/IgG2a response ↑ IFN-γ (9.274 ± 2.151 pg/mL, p<0.05), IL-2 (50 ± 5 pg/mL, p<0.05), and IL-10 (1,608 ± 380 pg/mL, p<0.05)                                          | Reduced (68%, p<0.05)   | Increased survival rate (80%, 30-day post challenge, p<0.05) Control mice were died within 11 days. | The data demonstrate that MIC1 and MIC4 triggered a protective response against toxoplasmosis, and that these antigens are targets for the further development of a vaccine.              | [22]      |
| MIC1+MIC4+MIC6 | FCA and FIA         | s.c         | C57BL/6 (H-2 <sup>b</sup> ) | 40 and 80 cysts of the ME49 strain, orally | Induced a strong IgG antibody response (p<0.05) induced mixed Th1/Th2 immune responses with predominance of IgG2b over IgG1 (p<0.05) ↑ IFN-γ, IL-12 p-40, and IL-10 (p<0.05) | Reduced (59%, p<0.05)   | Increased survival rate (70%, 30-day post challenge, p<0.05) Control mice were died within 11 days. | Our results demonstrate that microneme proteins are potential vaccines against <i>T. gondii</i> , since their inoculation prevents or decreases the deleterious effects of the infection. | [21]      |
| MIC1+MIC4+MIC6 | FCA and FIA         | s.c         | C57BL/6 (H-2 <sup>b</sup> ) | 40 and 80 cysts of the ME49 strain, orally | Induced a strong IgG antibody response (p<0.05)                                                                                                                              | Reduced (67.8%, p<0.05) | Increased survival rate (80%, 30-day post challenge, p<0.05)                                        | Our results demonstrate that microneme proteins are potential vaccines against <i>T. gondii</i> , since their inoculation prevents or decreases the deleterious effects of the infection. | [21]      |

MIC, microneme proteins; s.c, subcutaneous; IFN-γ, interferon-γ; IL, interleukin; Th1, T helper 1.
