# Supplementary material for: Recent progress in microneme-based vaccines development against Toxoplasma gondii
Source: PubMed Central journal article supplement — Clin Exp Vaccine Res. 2018 Jul 31;7(2):93–103. doi: 10.7774/cevr.2018.7.2.93 (PMC6082678; doi:10.7774/cevr.2018.7.2.93), 2018-07-31
Supplement: cevr-7-93-s005.pdf [file cevr-7-93-s005.pdf]

**Supplementary Table 5.** Examples of immunization with live-attenuated vectors expressing *Toxoplasma gondii* MICs in mouse models

| Antigen | Adjuvant/<br>Carrier                                                   | Ag<br>delivery | Mouse<br>strain | Challenge                                                   | Immune responses                                                                                                                                                                                                                                                                                                                                                                                                                                                                                                                                                                                                                                                                                                                                                                                                                                                                                                                                                                                                                                                          | Brain<br>cyst load | Survival                                                                                                                                             | Conclusions or suggestions                                                                                                                                                                                                                  | Reference |
|---------|------------------------------------------------------------------------|----------------|-----------------|-------------------------------------------------------------|---------------------------------------------------------------------------------------------------------------------------------------------------------------------------------------------------------------------------------------------------------------------------------------------------------------------------------------------------------------------------------------------------------------------------------------------------------------------------------------------------------------------------------------------------------------------------------------------------------------------------------------------------------------------------------------------------------------------------------------------------------------------------------------------------------------------------------------------------------------------------------------------------------------------------------------------------------------------------------------------------------------------------------------------------------------------------|--------------------|------------------------------------------------------------------------------------------------------------------------------------------------------|---------------------------------------------------------------------------------------------------------------------------------------------------------------------------------------------------------------------------------------------|-----------|
| MIC3    | -/pseudorabies virus (PRV)                                             | i.m            | BALB/c          | 1 × 10 <sup>2</sup><br>Tachyzoites,<br>RH strain, i.p       | Induced a strong IgG antibody response<br>Developed neutralizing antibodies<br>↑ Splenocyte proliferation (p<0.05)<br>↑ IFN-γ, IL-2, and IL-10 (p<0.05)<br>Similar levels of IL-4 in all groups (p>0.05)                                                                                                                                                                                                                                                                                                                                                                                                                                                                                                                                                                                                                                                                                                                                                                                                                                                                  | NR                 | Increased survival rate<br>(50%, 28-day post challenge, p<0.05)<br>Control mice were died within 9-10 days.                                          | These results suggested that expression of protective Ag of <i>T. gondii</i> in PRV is a novel approach towards the development of a vaccine against toxoplasmosis.                                                                         | [23]      |
|         | -/baculovirus (bv)                                                     | i.m            | BALB/c          | 1 × 10 <sup>3</sup><br>Tachyzoites,<br>RH strain, i.p       | Induced a strong IgG antibody response (p<0.01)<br>↑ Splenocyte proliferation (p<0.05)<br>↑ IFN-γ (p<0.05)<br>Similar levels of IL-4 and IL-10 between the different immunized and unimmunized groups (p>0.05)                                                                                                                                                                                                                                                                                                                                                                                                                                                                                                                                                                                                                                                                                                                                                                                                                                                            | NR                 | Prolonged survival time (p<0.05)<br>Control mice were died within 4 days.                                                                            | These results suggest that an excellent vector-mediated vaccine strategy might be used to develop a new generation of vaccines against <i>T. gondii</i> infection.                                                                          | [5]       |
|         | -/ <i>S. typhimurium</i> strain SV4089<br>Dam- and PhoP- mutant        | Orally         | ICR             | 5 × 10 <sup>2</sup><br>Tachyzoites,<br>RH strain, i.p       | Induced a strong IgG antibody response (p<0.05)<br>↑ Splenocyte proliferation (p<0.05)<br>Mixed IgG1/IgG2a response with the predominance of IgG2a over IgG1 (p<0.05)<br>↑ IFN-γ (721 ± 142 pg/mL, p<0.01)                                                                                                                                                                                                                                                                                                                                                                                                                                                                                                                                                                                                                                                                                                                                                                                                                                                                | NR                 | Prolonged survival time (11 days compared with 6 days in control, p<0.05)                                                                            | This study preliminarily shows that attenuated <i>S. typhimurium</i> strain (Dam- and PhoP-) could be utilized as an oral delivery vector for recombinant eukaryotic expression plasmids as DNA vaccines for prevention from toxoplasmosis. | [24]      |
| MIC8    | -/MLP recombinant baculovirus (rBV)<br>influenza matrix protein 1 (M1) | i.m,<br>i.n    | BALB/c          | 1 × 10 <sup>5</sup><br>Tachyzoites,<br>RH strain,<br>orally | i.n mice group showed higher levels of <i>T. gondii</i> -specific IgG antibody response compared to i.m mice group (p<0.01).<br>i.n mice group showed higher levels of <i>T. gondii</i> -specific IgG1 antibody response compared to IgG2a and IgG2b antibody responses, indicating that i.n administration induced Th2-dominant responses.<br>Higher levels of <i>T. gondii</i> -specific IgG or IgA antibodies were detected in serum or feces in i.n mice groups (p<0.01).<br>Significant reduction of tachyzoites recovered from abdominal cavities in i.n mice compared to i.m as neutralizing antibody response (p<0.01).<br>Higher populations of CD4 <sup>+</sup> and CD8 <sup>+</sup> T cells and germinal center B cells were found in i.n and i.m mice groups compared to non-infected naïve and non-immunized control groups.<br>Significantly higher populations of germinal center B cells (14.4%), CD4 <sup>+</sup> T cells (29.84%) and CD8 <sup>+</sup> T cells (12.55%) were observed in i.n mice group compared to that in i.m group (p<0.05, p<0.01). | NR                 | Increased survival rate<br>i.n group: 100%, 16-day post challenge<br>i.m group: 60%, 16-day post challenge<br>Control mice were died within 12 days. | Our study shows the effective protection against <i>T. gondii</i> infection provided by VLPs containing MIC8 of <i>T. gondii</i> , thus indicating a potential <i>T. gondii</i> vaccine candidate.                                          | [25]      |

(Continued to the next page)

Supplementary Table 5. Continued

| Antigen                                                                                                                                                                                                                                                                | Adjuvant/Carrier                                        | Ag delivery                                                                                                                                                                                                                                                             | Mouse strain | Challenge                                                                                                                              | Immune responses                                                                                                                                                                                                                                                                                                                                                                                                                                                                                                                                                                                                                                                                                                                                                                                                                                                                                         | Brain cyst load                                                                                                                                             | Survival                                                                                                                                                        | Conclusions or suggestions                                                                                                                                                                                                                                                                                                     | Reference |
|------------------------------------------------------------------------------------------------------------------------------------------------------------------------------------------------------------------------------------------------------------------------|---------------------------------------------------------|-------------------------------------------------------------------------------------------------------------------------------------------------------------------------------------------------------------------------------------------------------------------------|--------------|----------------------------------------------------------------------------------------------------------------------------------------|----------------------------------------------------------------------------------------------------------------------------------------------------------------------------------------------------------------------------------------------------------------------------------------------------------------------------------------------------------------------------------------------------------------------------------------------------------------------------------------------------------------------------------------------------------------------------------------------------------------------------------------------------------------------------------------------------------------------------------------------------------------------------------------------------------------------------------------------------------------------------------------------------------|-------------------------------------------------------------------------------------------------------------------------------------------------------------|-----------------------------------------------------------------------------------------------------------------------------------------------------------------|--------------------------------------------------------------------------------------------------------------------------------------------------------------------------------------------------------------------------------------------------------------------------------------------------------------------------------|-----------|
| MIC3+SAG1                                                                                                                                                                                                                                                              | -/pseudorabies virus (PRV)                              | i.m                                                                                                                                                                                                                                                                     | BALB/c       | 1 × 10 <sup>2</sup> Tachyzoites, RH strain, i.p                                                                                        | Induced a strong IgG antibody response<br>Developed neutralizing antibodies<br>↑ Splenocyte proliferation (p<0.05)<br>↑ IFN-γ, IL-2, and IL-10 (p<0.05)<br>Similar levels of IL-4 in all groups (p>0.05)                                                                                                                                                                                                                                                                                                                                                                                                                                                                                                                                                                                                                                                                                                 | NR                                                                                                                                                          | Increased survival rate (66.7%, 28-day post challenge, p<0.05)<br>Control mice were died within 9-10 days.                                                      | These results suggested that expression of protective antigens of <i>T. gondii</i> in PRV is a novel approach towards the development of a vaccine against toxoplasmosis.                                                                                                                                                      | [23]      |
|                                                                                                                                                                                                                                                                        | -/baculovirus (bv)                                      | i.m                                                                                                                                                                                                                                                                     | BALB/c       | 1 × 10 <sup>3</sup> Tachyzoites, RH strain, i.p                                                                                        | Induced a strong IgG antibody response (p<0.01)<br>↑ Splenocyte proliferation (p<0.05)<br>↑ IFN-γ (p<0.05)<br>Similar levels of IL-4 and IL-10 between the different immunized and unimmunized groups (p>0.05)                                                                                                                                                                                                                                                                                                                                                                                                                                                                                                                                                                                                                                                                                           | NR                                                                                                                                                          | Increased survival rate (50%, 22-day post challenge, p<0.05)<br>Control mice were died within 4 days.                                                           | These results suggest that an excellent vector-mediated vaccine cocktail strategy might be used to develop a new generation of vaccines against <i>T. gondii</i> infection.                                                                                                                                                    | [5]       |
|                                                                                                                                                                                                                                                                        | -/S. typhimurium strain SV4089<br>Dam- and PhoP- mutant | Orally                                                                                                                                                                                                                                                                  | ICR          | 5 × 10 <sup>2</sup> Tachyzoites, RH strain, i.p                                                                                        | Induced a strong IgG antibody response (p<0.05)<br>↑ Splenocyte proliferation (p<0.05)<br>Mixed IgG1/IgG2a response with the predominance of IgG2a over IgG1 (p<0.05)<br>↑ IFN-γ (1,089 ± 163 pg/mL, p<0.01)                                                                                                                                                                                                                                                                                                                                                                                                                                                                                                                                                                                                                                                                                             | NR                                                                                                                                                          | Increased survival rate (p<0.05)                                                                                                                                | The current study shows that the oral multi-antigenic DNA vaccine, Z3111/pSAG1-MIC3, produces partial protection against <i>T. gondii</i> challenge.                                                                                                                                                                           | [24]      |
| Encoding MAS and UMAS<br>ROP1 <sup>8307-336</sup> ,<br>SAG3 <sup>3101-144</sup> ,<br>MIC6 <sup>286-347</sup> ,<br>GRA7 <sup>182-224</sup> ,<br>MAG1 <sup>58-125</sup> ,<br>BAG1 <sup>156-211</sup> ,<br>and SPA <sup>142-200</sup><br>DNA vaccine or/and<br>Ad vaccine | Ubiquitin/Ad                                            | DNA vaccines (p-MAS or p-UMAS plasmid, 100 µg each), i.m or recombinant Ad vaccine (Ad-UMAS virus, 3 × 10 <sup>8</sup> PFU each), i.m or the combination of DNA vaccine (p-UMAS, 100 µg each) and recombinant Ad vaccine (Ad-UMAS virus, 3 × 10 <sup>8</sup> PFU each). | BALB/c       | Acute: 1 × 10 <sup>3</sup> tachyzoites, RH strain (genotype I), i.p<br>Chronic: 20 cysts PRU strain (genotype II), i.g via oral gavage | Induced a strong IgG antibody response in both p-MAS and p-UMAS immunized mice (especially in the p-UMAS group), compared to control groups.<br>↑ Splenocyte proliferation in both p-MAS and p-UMAS immunized mice (a further 30% increase in latter group)<br>↑ IFN-γ and IL-2 secretion in both p-MAS and p-UMAS immunized mice (especially in the p-UMAS group), compared to control groups<br>↑ Levels of an IgG1 and IgG2a in p-MAS and p-UMAS immunized mice (predominance of IgG2a over IgG1), compared to control groups<br>↑ Percentages of CD4 <sup>+</sup> T and CD8 <sup>+</sup> cells in p-MAS and p-UMAS groups<br>Significantly higher levels of IFN-γ and IL-2 secretion and increased splenocyte proliferation in Ad-UMAS immunized mice compared with p-UMAS group (p<0.05)<br>↑ Percentages of CD8 <sup>+</sup> T cells in immunized with Ad-UMAS compared with p-UMAS group (p<0.05) | Reduced (p<0.01).<br>The brain cyst burden was 50% lower in p-MAS group (833 ± 116), compared with the control groups p-UMAS (570 ± 98) Ad-UMAS (469 ± 103) | Increased survival rate p-MAS: 33% survival 28 days after challenge<br>p-UMAS: 50% survival 28 days after challenge<br>Control mice were died within 8-10 days. | Distinct humoral and cellular immunity induced by immunization with DNA vaccine and recombinant Ad vaccine encoding ubiquitin conjugated multistage Ag of <i>T. gondii</i> . The DNA vaccine had the advantage of inducing a stronger humoral response, whereas the Ad-vectored vaccine improved the cellular immune response. | [26]      |

(Continued to the next page)

Supplementary Table 5. Continued

| Antigen             | Adjuvant/<br>Carrier | Ag<br>delivery                      | Mouse<br>strain | Challenge                                                                                                                                             | Immune responses                                                                                                                                                                                                                                                                                                                                                                                                                                                                                                                                                                                                                                                                                                                                                                                                                                                                                                                                                                                                                                                                                                                                                                                                                                                                                                                                                                                                                                                                                                                         | Brain<br>cyst load                                                                                                                                                                                                                      | Survival                                                                                                                                  | Conclusions or suggestions | Reference |
|---------------------|----------------------|-------------------------------------|-----------------|-------------------------------------------------------------------------------------------------------------------------------------------------------|------------------------------------------------------------------------------------------------------------------------------------------------------------------------------------------------------------------------------------------------------------------------------------------------------------------------------------------------------------------------------------------------------------------------------------------------------------------------------------------------------------------------------------------------------------------------------------------------------------------------------------------------------------------------------------------------------------------------------------------------------------------------------------------------------------------------------------------------------------------------------------------------------------------------------------------------------------------------------------------------------------------------------------------------------------------------------------------------------------------------------------------------------------------------------------------------------------------------------------------------------------------------------------------------------------------------------------------------------------------------------------------------------------------------------------------------------------------------------------------------------------------------------------------|-----------------------------------------------------------------------------------------------------------------------------------------------------------------------------------------------------------------------------------------|-------------------------------------------------------------------------------------------------------------------------------------------|----------------------------|-----------|
| Encoding<br>Ad-UMAS | Ubiquitin/Ad         | i.m,<br>i.n,<br>s.c,<br>i.o,<br>i.v | BALB/c          | Acute: $1 \times 10^3$<br>tachyzoites,<br>RH strain<br>(type I),<br>i.p<br>Chronic: 20<br>cysts PRU<br>strain<br>(type II),<br>i.g via oral<br>gavage | <p>↑ Levels of <i>T. gondii</i>-specific IgG antibodies in the five Ad-UMAS immunization routes, compared to the controls (<math>p &lt; 0.05</math>).</p> <p>Highest titer of IgG antibody was observed by i.m route and followed by s.c, i.n, i.o and i.v.</p> <p>↑ IgG subtypes in the five Ad-UMAS immunization routes, compared to the controls (<math>p &lt; 0.05</math>)</p> <p>Significantly higher values of IgG2a in i.m and s.c vaccination groups, compared with other vaccination routes</p> <p>Significantly higher values of IgA in i.n and i.o vaccination groups, compared with other vaccination routes</p> <p>↑ Percentages of CD4<sup>+</sup> and CD8<sup>+</sup> T cells in the five Ad-UMAS immunization routes, compared to the controls (<math>p &lt; 0.05</math>).</p> <p>Significantly higher percentages of CD4<sup>+</sup> and CD8<sup>+</sup> T cells in i.n and i.o vaccination groups, compared with other vaccination routes</p> <p>↑ IFN-<math>\gamma</math> and IL-2 in the five Ad-UMAS immunization routes, compared to the controls (<math>p &lt; 0.05</math>)</p> <p>Significantly higher secretion of IFN-<math>\gamma</math> and IL-2 in i.n and i.o vaccination groups, compared with other vaccination routes</p> <p>↑ lymphocyte proliferation ability in the five Ad-UMAS immunization routes, compared to the controls (<math>p &lt; 0.05</math>)</p> <p>Significantly higher lymphocyte proliferation ability in i.n and i.o vaccination groups, compared with other vaccination routes</p> | <p>Increased survival rate i.m, i.o, and i.n vaccinated groups: 50% survival rate 28 days after challenge i.v and s.c vaccinated groups: 40% survival rate 28 days after challenge.</p> <p>All the control mice died within 8 days.</p> | <p>Ad-UMAS could be an effective and safe mucosal candidate vaccine to protect animals and humans against <i>T. gondii</i> infection.</p> | [27]                       |           |

MIC, microneme proteins; i.m, intramuscular; IFN- $\gamma$ , interferon- $\gamma$ ; IL, interleukin; i.p, intraperitoneal; i.n, intranasal; NR, Not reported; s.c, subcutaneous; i.o, intraoral; i.v, intravenous.
